# Supplementary material for: Evaluating the sensitivity of radical chemistry and ozone formation to ambient VOCs and NO x in Beijing
Source: Copernicus journal article supplement (doi:10.5194/acp-21-2125-2021), 2021-02-12
Supplement: Supplementary file 1 [file acp-21-2125-2021-supplement.pdf]

Supplement of Atmos. Chem. Phys., 21, 2125–2147, 2021  
<https://doi.org/10.5194/acp-21-2125-2021-supplement>  
© Author(s) 2021. This work is distributed under  
the Creative Commons Attribution 4.0 License.

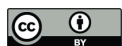

*Supplement of*

## **Evaluating the sensitivity of radical chemistry and ozone formation to ambient VOCs and NO<sub>x</sub> in Beijing**

**Lisa K. Whalley et al.**

*Correspondence to:* Lisa Whalley (l.k.whalley@leeds.ac.uk)

The copyright of individual parts of the supplement might differ from the CC BY 4.0 License.

## Supplementary Information

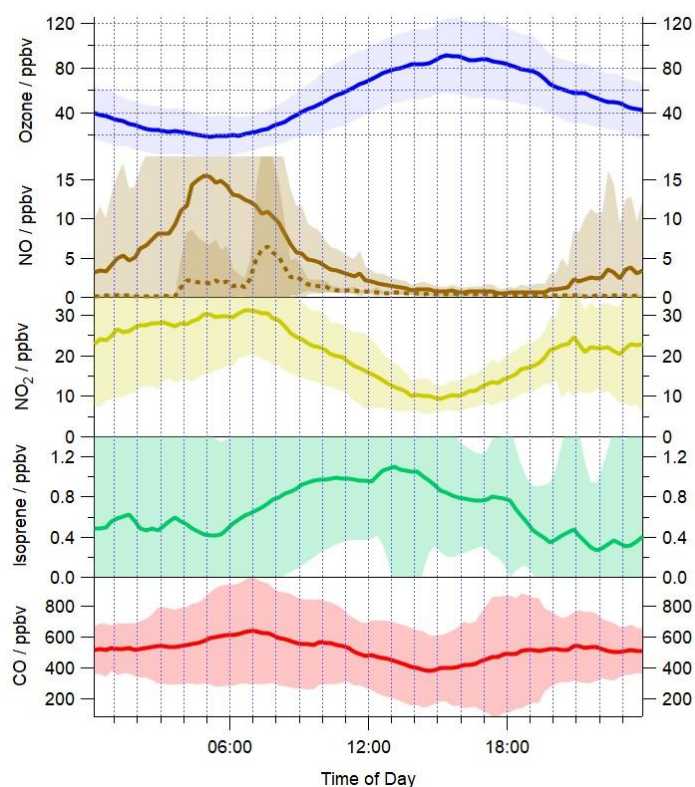

**Figure S1:** Average profiles for the observed O<sub>3</sub>, NO, NO<sub>2</sub>, isoprene, and CO at 15 minute intervals over 24 hours. The solid lines represent the campaign average whilst the dashed line is the average NO profile between 16<sup>th</sup> – 22<sup>nd</sup> June.

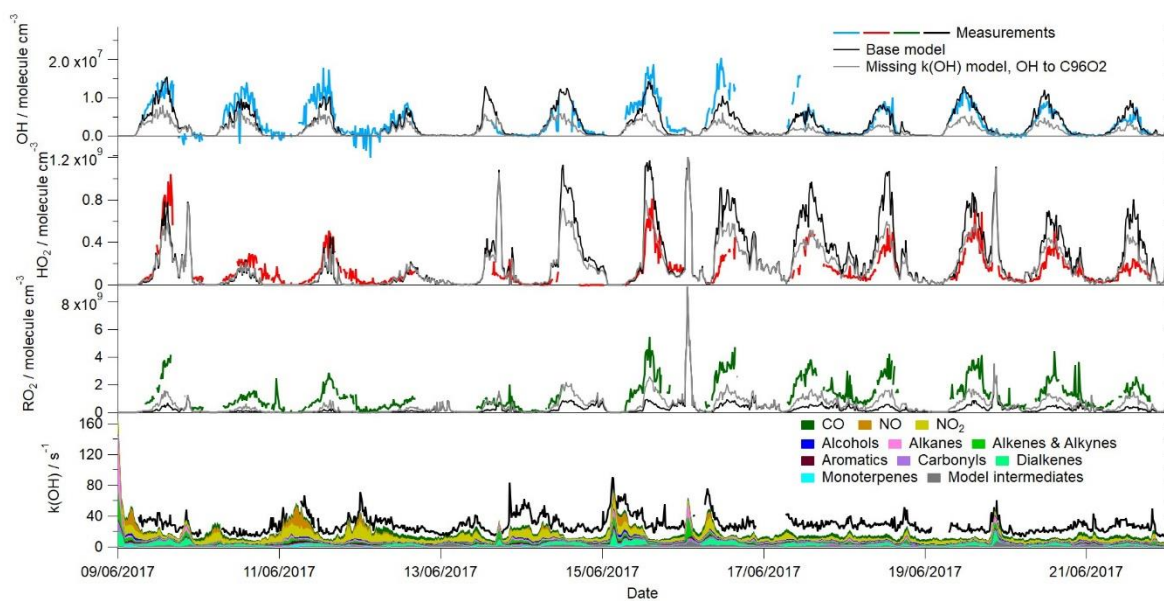

**Figure S2:** Time-series of the measured and modelled OH, HO<sub>2</sub>, total RO<sub>2</sub> and OH reactivity from the 9<sup>th</sup> – 22<sup>nd</sup> June which encompasses high NO days (9<sup>th</sup> – 12<sup>th</sup> June) and low NO days (16<sup>th</sup> – 22<sup>nd</sup> June).

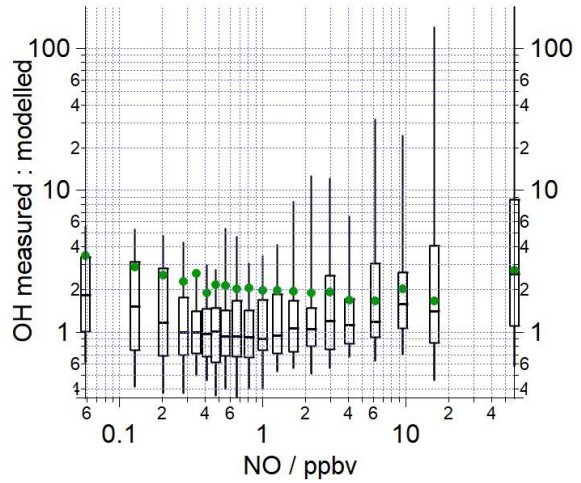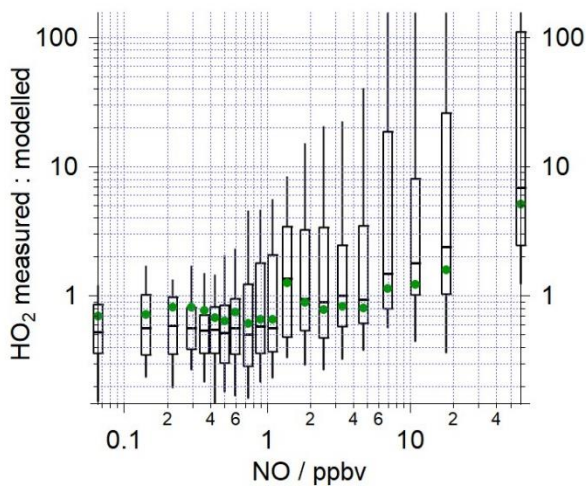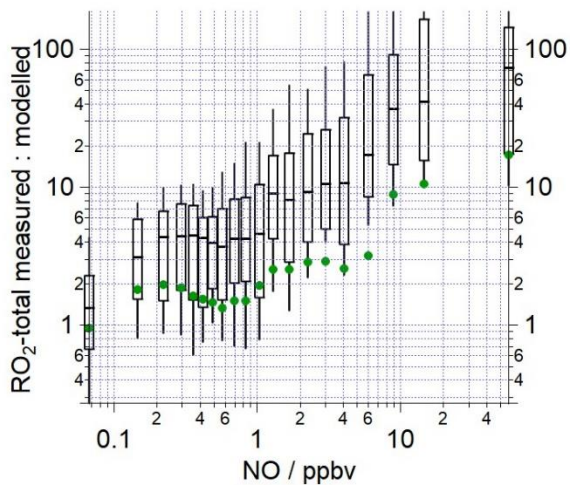

Figure S3: The median ratio (-) of the measured to modelled (base) OH, HO<sub>2</sub> and total RO<sub>2</sub> binned over the NO mixing ratio range encountered during the campaign on a logarithmic scale. The box and whiskers represent the 25th/75th and 5th/95th confidence intervals. The green circles display the measured to modelled OH, HO<sub>2</sub> and total RO<sub>2</sub> ratio when the model includes missing OH reactivity in the form of a single reaction which converts OH to C96O2. The number of data points in each of the NO bins is ~80.

The median measured to modelled (Missing  $k(\text{OH})$  (OH to C96O2)) ratio vs NO (green circles) is displayed in figure S3 alongside median measured to modelled (base) ratio. The inclusion of alkoxy isomerisation following  $\text{RO}_2 + \text{NO}$  reaction increases the modelled  $\text{RO}_2$  concentration across the entire NO range (bottom panel) but, considering the log scale, has the biggest impact on the ratio (from the measured to modelled (base) ratio) at the highest NO concentration. The  $\text{HO}_2$  median measured to modelled (Missing  $k(\text{OH})$  (OH to C96O2)) ratio vs NO in the middle panel increases from the measured to modelled (base) ratio at NO mixing ratios  $<1$  ppbv, indicating improved agreement. At higher NO mixing ratios, where the base model begins to underpredict  $\text{HO}_2$ , due to the large under-prediction in  $\text{RO}_2$ , this under-prediction is reduced in the missing  $k(\text{OH})$  (OH to C96O2) scenario owing to the increase in modelled  $\text{RO}_2$ .

The  $\text{HO}_2$  median measured to modelled (Missing  $k(\text{OH})$  (OH to C96O2)) ratio vs NO in the middle panel increases from the measured to modelled (base) ratio at NO mixing ratios  $<1$  ppbv, indicating improved agreement. At higher NO mixing ratios, where the base model begins to underpredict  $\text{HO}_2$ , due to the large under-prediction in  $\text{RO}_2$ , this under-prediction is reduced in the missing  $k(\text{OH})$  (OH to C96O2) scenario owing to the increase in modelled  $\text{RO}_2$ .

The OH median measured to modelled (Missing  $k(\text{OH})$  (OH to C96O2)) ratio vs NO (top panel) highlights a missing OH source, the magnitude of which decreases as NO concentrations increase.
